1 **Bromodomain inhibition reveals FGF15/19 as a target of epigenetic regulation**

2 **and metabolic control**

3 Chisayo Kozuka<sup>1,4,†</sup>, Vicencia Sales<sup>1,4</sup>, Soravis Osataphan<sup>1,4</sup>, Yixing Yuchi<sup>1,4</sup>, Jeremy

4 Chimene-Weiss<sup>1</sup>, Christopher Mulla<sup>1,4</sup>, Elvira Isganaitis<sup>1,4</sup>, Jessica Desmond<sup>1</sup>, Suzuka

5 Sanechika<sup>1</sup>, Joji Kusuyama<sup>1,4</sup>, Laurie Goodyear<sup>1,4</sup>, Xu Shi<sup>3,4</sup>, Robert E. Gerszten<sup>3,4</sup>, Lei

6 Wu<sup>2,4</sup>, Jun Qi<sup>2,4</sup>, and Mary-Elizabeth Patti<sup>1,4,\*</sup>

7

8 <sup>1</sup>Section of Integrative Physiology and Metabolism, Research Division, Joslin Diabetes  
9 Center, Boston, MA, USA

10 <sup>2</sup>Dana Farber Cancer Institute, Boston, MA, USA

11 <sup>3</sup>Cardiology Division, Beth Israel Deaconess Medical Center, Boston, MA, USA

12 <sup>4</sup>Harvard Medical School, Boston, MA, USA

13 <sup>†</sup>Current affiliation: YCI Laboratory for Metabolic Epigenetics, RIKEN Center for  
14 Integrative Medical Sciences, Kanagawa, Japan

15

16 Running title: FGF15/19 is a target of bromodomain inhibition and metabolic control

17 \*Correspondence:

18 Mary-Elizabeth Patti

19 Room 620, Joslin Diabetes Center, 1 Joslin Place, Boston, MA 02215

20 Phone: 617-309-1966

21 FAX: 617-309-2593

22 Email: [mary.elizabeth.patti@joslin.harvard.edu](mailto:mary.elizabeth.patti@joslin.harvard.edu)

23

24 **Summary**

25 Epigenetic regulation is an important factor in glucose metabolism, but underlying  
26 mechanisms remain largely unknown. Here we demonstrated that  
27 bromodomain-containing proteins (Brds), transcriptional regulators binding to acetylated  
28 histone, are potent modulators of glucose metabolism via the gut-liver farnesoid X  
29 receptor (FXR)-fibroblast growth factor 15/19 (FGF15/19) pathway. In vivo inhibition of  
30 Brd4 by the inhibitor JQ1 in mice strongly inhibited ileal expression of FGF15, resulting  
31 in decreased FGFR4-related signaling, increased glucose production in the liver and  
32 hyperglycemia. Adverse metabolic effects of BRD4 inhibition were reversed by  
33 overexpression of FGF19, with improvement in hyperglycemia. At a cellular level, we  
34 demonstrate that BRD4 binds to the promoter region of FGF19 in human intestinal cells;  
35 BRD inhibition by JQ1 reduces binding to the FGF19 promoter and downregulates  
36 FGF19 expression. Thus, we identify Brd4 as a novel transcriptional regulator of  
37 intestinal FGF15/19 in ileum, and a contributor to hepatic and systemic glucose  
38 metabolism.

39

40 **Keywords**

41 Epigenetics, bromodomain inhibition, FGF15/19, glucose metabolism

42 **Introduction**

43 Type 2 diabetes (T2D) is a complex disorder influenced by interactions between  
44 multiple genetic loci and environmental factors (Pinney and Simmons, 2010).  
45 Environmental factors contributing to metabolic disease, such as intrauterine  
46 environment, diet and physical activity, may mediate risk via epigenetic mechanisms,  
47 such as DNA methylation, histone modification, and noncoding RNAs. Given that  
48 epigenetic mediators are influenced by metabolic signals and in turn modulate  
49 transcriptional and/or developmental responses, understanding mechanisms by which  
50 epigenetic signals influence metabolic disease risk is a key scientific challenge.

51 One key epigenetic mark is histone acetylation, which mediates chromatin accessibility  
52 to transcriptional factors and coactivators (Verdin and Ott, 2015). In turn, histone  
53 acetylation is mediated by histone acetyltransferase (HAT) and removed by histone  
54 deacetylase (HDAC). Modulation of histone acetylation can alter systemic metabolism.  
55 For example, mice with heterozygous deficiency of the HAT CREB-binding protein  
56 (CBP), remain insulin sensitive, despite lipodystrophy (Yamauchi et al., 2002).  
57 Conversely, deletion of HDAC in skeletal muscle increases lipid oxidation, energy  
58 expenditure and insulin resistance (Gaur et al., 2016; Hong et al., 2017). Together,  
59 these data demonstrate that histone acetylation plays an important role in energy

60 expenditure and glucose metabolism.

61 The Bromodomain and Extra-Terminal Domain (BET) family of proteins has two  
62 tandem bromodomains that recognize acetylated lysine of histones or non-histone  
63 targets. The mammalian BET family comprises bromodomain-containing proteins 2  
64 (Brd2), Brd3, Brd4 and BrdT in mammals, which are “readers” that bind to acetylated  
65 histones and recruit transcription factors (Marmorstein and Zhou, 2014). While Brds are  
66 recognized for their potential as a target in cancer therapeutics, Brds also influence  
67 metabolism. For example, mice with genetic disruption of Brd2 have severe obesity, but  
68 normal glucose metabolism, potentially via increased peroxisome-proliferator-activated  
69 receptor (PPAR)- $\gamma$  activity (Wang et al., 2009). Brd4 binds to enhancers regulating  
70 adipogenesis and myogenesis (Lee et al., 2017). Moreover, Brd4 is a coactivator of  
71 nuclear factor- $\kappa$ B, (Huang et al., 2009; Mauro et al., 2011), and inhibition of Brd4 can  
72 modulate OXPHOS capacity (Barrow et al., 2016). However, the role of BET proteins in  
73 systemic metabolism remains ill-defined.

74 Mouse fibroblast growth factor (FGF) 15 and its human ortholog FGF19 share about  
75 50% amino acid identity and have similar physiological functions to regulate  
76 intestine-to-liver crosstalk via a complex feedback loop (Markan and Potthoff, 2016).  
77 Bile acids are synthesized from cholesterol in the liver and enter the enterohepatic

78 circulation. After entry into the intestinal lumen, bile acids are transported into  
79 enterocytes by apical sodium dependent bile acid transporter (ASBT) and activate the  
80 farnesoid X receptor (FXR) to promote FGF15/19 gene transcription and secretion of  
81 FGF15/19 into the circulation. In the liver, FGF15/19 binds to and activates the FGF  
82 receptor 4 (FGFR4)/ $\beta$ -klotho receptor complex, leading to suppression of bile acid  
83 synthesis via repression of the rate-limiting enzyme cytochrome P450 7A1 (CYP7A1).  
84 FGF15/19 also exerts potent effects on glucose metabolism, reducing blood glucose via  
85 increased activity of Agouti-related peptide/Neuropeptide Y neurons in hypothalamus  
86 (Liu et al., 2018; Morton et al., 2013) and modulation of hepatic metabolism, including  
87 inhibition of gluconeogenesis and lipogenesis and increased glycogen synthesis  
88 (Owen et al., 2015). We now demonstrate that the FGF15/19 signaling pathway is a  
89 target of epigenetic modification by the bromodomain inhibitor, JQ-1.

90

## 91 **Results**

### 92 ***Brd4 inhibition by JQ-1 decreases body weight and induces hyperglycemia***

93 JQ-1, a Brd inhibitor, shows high selectivity for Brd4 (Filippakopoulos et al., 2010). To  
94 determine the effect of Brd4 inhibition on body weight and glucose metabolism, we  
95 treated CD1 mice with JQ-1 (25 mg/kg intraperitoneally) for 11 days (**Figure 1A**). This

96 dose was previously shown to be without toxic effects during long term treatment  
97 (Filippakopoulos et al., 2010). JQ-1 decreased body weight modestly (Veh:  $41.4 \pm 0.9$  g;  
98 JQ-1:  $36.8 \pm 0.5$  g,  $p < 0.01$ ) (**Figure 1B**). Modest effects on food intake were observed in  
99 one cohort (Veh:  $5.4 \pm 0.2$  g/day; JQ-1:  $3.7 \pm 1.1$  g/day), but not in subsequent cohorts  
100 of mice treated with the same dose of JQ-1. Blood glucose was significantly increased  
101 in JQ-1 treated mice vs. vehicle, both after a 4-hour fast (Veh:  $186 \pm 17$  mg/dl; JQ-1:  $264$   
102  $\pm 14$  mg/dl,  $p < 0.01$ , **Figure 1C**) and during intraperitoneal glucose tolerance testing  
103 (peak glucose: Veh:  $384 \pm 18$  mg/dl; JQ-1:  $592 \pm 8$  mg/dl,  $p < 0.01$ ) (**Figure 1D-E**).

104 We next analyzed potential contributors to hyperglycemia in JQ-1-treated mice. While  
105 fasting plasma insulin did not differ, insulin levels were significantly decreased in  
106 JQ-1-treated mice after glucose injection (50% reduction at 15 minutes,  $p < 0.05$ ) (**Figure**  
107 **1F**). Glucose similarly reduced glucagon levels in both vehicle and JQ-1-treated mice  
108 (**Figure 1G**). JQ-1 had no effect on pancreatic islet size (Veh;  $15,427 \pm 3,503$   $\mu\text{m}^2$ , JQ;  
109  $14,763 \pm 1,928$   $\mu\text{m}^2$ ) (**Figure 1H, I**). There was no difference in insulin sensitivity as  
110 determined by ITT (**Figure 1J**). Glycerol tolerance testing revealed greater increase in  
111 blood glucose in JQ-1-treated mice vs. vehicle-treated mice (**Figure 1K, L**).

112 Fasting hyperglycemia in JQ-1-treated mice without change in fasting insulin and  
113 increased glycemetic response to glycerol suggested increased gluconeogenesis. We

114 therefore asked whether this was related to impaired insulin action or cell autonomous  
115 insulin resistance. Hepatic insulin action *in vivo*, as measured by Akt phosphorylation  
116 (**Figure S1A-C**) did not differ. Moreover, basal glucose production in primary  
117 hepatocytes did not differ with JQ-1, and the effect of insulin to suppress glucose  
118 production was only modestly reduced (vehicle vs. JQ-1,  $p = 0.05$ , **Figure S1D**).  
119 Together, these data suggested that reduction in systemic insulin sensitivity or cell  
120 autonomous hepatic insulin action was not likely the dominant mediator of *in vivo*  
121 hyperglycemia.

122

### 123 ***JQ-1 alters hepatic gene expression and sterol metabolism***

124 To identify potential molecular mediators of fasting hyperglycemia *in vivo*, we analyzed  
125 gene expression in the liver using microarray. 1471 genes were upregulated and 1036  
126 genes were downregulated by JQ-1 (FDR<0.25). Pathway analysis using Gene Set  
127 Enrichment Analysis (GSEA) and REACTOME pathways (**Table S1**) revealed  
128 upregulation of multiple pathways related to glucose production and lipid metabolism  
129 (biosynthesis of triglycerides, fatty acids, and cholesterol;  $\beta$ -oxidation) in JQ-1-treated  
130 mice (**Figure S1E, F**). Analysis of individual genes revealed increased expression of  
131 genes related to gluconeogenesis (fold change vs. vehicle: *Pepck*:  $1.6 \pm 0.2$ ,  $p < 0.01$ ,

132 *G6pase*:  $2.0 \pm 0.6$ , **Figure S1G, H**). Effects on lipid metabolism were more striking,  
133 with significant increases in expression of genes regulating FA synthesis (*Acc*:  $1.9 \pm 0.2$ ,  
134  $p < 0.01$ ; *Fasn*  $2.2 \pm 0.3$ ,  $p < 0.01$ ),  $\beta$ -oxidation (*Ppara*:  $1.6 \pm 0.1$ ,  $p < 0.01$ ; *Cpt1a*:  $1.2 \pm$   
135  $0.0$ ,  $p < 0.01$ ), and cholesterol synthesis (e.g. *Hmgcr*, *Hmgcs1*, and *Srebp2*) (**Figure**  
136 **S1I-O**).

137 Given these prominent patterns of lipid-related gene expression in JQ-1 treated mice,  
138 we analyzed plasma and hepatic lipids. There were no differences in either plasma or  
139 hepatic triglycerides (**Figure S2A, B**). By contrast, cholesterol levels were reduced by  
140 52% in plasma ( $p < 0.05$ ), with 28% reduction in liver content in JQ-1-treated mice  
141 (plasma: veh;  $165 \pm \text{mg/dl}$ , JQ-1;  $79 \pm 29 \text{ mg/dl}$ ,  $p < 0.05$ ; liver: veh;  $0.94 \pm 0.1 \text{ mg/g}$   
142 tissue, JQ-1;  $0.68 \pm 0.1 \text{ mg/g tissue}$ ,  $p < 0.05$ ) (**Figure S2C, D**).

143 Reductions in both plasma and tissue cholesterol levels, despite significantly increased  
144 expression of cholesterol synthetic genes, suggested that cholesterol catabolic  
145 pathways, such as bile acid metabolism, may be upregulated. Indeed the major  
146 enzymes of both classic and alternative bile acid synthesis pathways were upregulated  
147 by JQ-1, with a 1.4-fold increase in the rate-limiting enzyme *Cyp7a1* ( $p = 0.08$ ) and  
148 1.2-fold increase in *Cyp27a1* ( $p < 0.01$ ) (**Figure S1P, Q and Figure S2E**). However,  
149 there was no net difference in hepatic and plasma bile acid composition between



150 vehicle and JQ-1-treated mice (**Figure S2F, G**), potentially linked to downregulation of  
151 the downstream enzymes Cyp7b1 and Cyp8b1 (reduced by 56 and 46% respectively,  
152 **Figure S2E**).

153 The complex pattern of lipid, sterol, and bile acid gene expression and metabolism in  
154 JQ-1-treated liver raised the possibility that FGF receptor-dependent signaling might be  
155 reduced by JQ-1. Indeed, 10 of 14 top-ranking pathways *downregulated* in JQ-1-treated  
156 mice were related to FGFR signaling (FDR <0.25, **Figure 2A**). Expression of Fgfr4 as  
157 determined by PCR was decreased by 27% ( $p < 0.01$ ) with a similar trend for its  
158 coreceptor beta-Klotho (17% lower,  $p = 0.07$ ). Moreover, Fgfr signaling was significantly  
159 reduced with a 46% reduction in phosphorylation of FGF receptor substrate 2 (FRS2) in  
160 liver protein extracts of JQ-1 treated mice ( $p < 0.01$ , **Figure S1A, B**).

161

#### 162 ***Brd4 inhibition by JQ-1 reduces ileal expression of Fgf15***

163 Upregulation of bile acid synthetic enzymes and downregulation of FGFR-mediated  
164 signaling suggest that JQ1 modulated systemic and hepatic lipid and bile acid  
165 metabolism via the complex regulatory loop involving the bile acid-responsive hormone  
166 FGF15/19. FGF15 (FGF19 in humans) is produced in intestinal enterocytes in response  
167 to bile acids, secreted into the bloodstream, and binds FGF receptors in the liver to

168 inhibit both bile acid synthesis and cholesterol metabolism (Kim et al., 2015; Kliewer  
169 and Mangelsdorf, 2015).

170 Luminal bile acids are transported into enterocytes by ASBT (Slc10a2), where they  
171 can bind to FXR and activate its transcriptional activity to increase expression of its  
172 targets including *Fgf15*, *Shp*, *Slc15a* and *Slc51b* (Wong et al., 2011). While there was  
173 no change in no change in Slc10a2, Tgr5, Fxr, or RXRa expression in ileum of  
174 JQ-1-treated mice (not shown), we observed profound alterations in expression of FXR  
175 target genes. Expression of *Fgf15* and *Shp* was reduced by 90% and 95% ( $p < 0.01$  for  
176 all), with similar trend for *Slc51a* and *Slc51b* (**Figure 2E-H**). In agreement, plasma  
177 FGF15 was decreased by 29% in JQ-1-treated mice (veh;  $2.1 \pm 0.1$  ng/ml, JQ-1;  $1.4 \pm$   
178  $0.1$  ng/ml,  $p < 0.05$ ) (**Figure 2I**).

179 We next evaluated potential mechanisms mediating JQ-1 decreases in *Fgf15*  
180 expression. Previous studies have shown that RNAi-mediated silencing of *Brd4* reduces  
181 intestinal cellular diversity (Bolden et al., 2014), potentially via reduced intestinal stem  
182 cell differentiation (Nakagawa et al., 2016); thus, alterations in number or function of  
183 specific intestinal cell subtypes could potentially contribute to JQ-1-mediated changes in  
184 intestinal FGF15 levels. Histologic analysis revealed no change in the overall villus  
185 structure in JQ-1-treated mice (**Figure 2J**). However, JQ-1 was associated with reduced

186 numbers of Paneth cells, as previously reported (Bolden et al., 2014) (**Figure S3A**). In  
187 parallel, mRNA levels of Reg4, a Paneth cell marker, were decreased by JQ-1, but  
188 expression of the microbicidal functional marker  $\alpha$ -defensin cryptdin-4 (Crp4) did not  
189 differ (**Figure S3G, K**) (Ouellette, 2011). Moreover, there was no change in expression  
190 of other cell type markers for enterocytes (keratin 20 (Krt20)), enteroendocrine cells  
191 (hepatocyte nuclear factor (HNF) 1 $\alpha$ ), neuroendocrine cells (chromogranin A (ChgA)),  
192 goblet cells (mucin 2 (Muc2)), stem cells (leucine-rich orphan G-protein-coupled  
193 receptor 5 (Lgr5)), or intestinal neuroendocrine peptides (*Gcg* or *Pyy*), suggesting  
194 JQ-1-mediated reduction in Fgf15 expression was not related to global alterations in cell  
195 type distribution (**Figure S3B-J**).

196

#### 197 ***JQ-1 inhibits Brd4 binding to the Fgf15 promoter in HT-29 cells***

198 Marked downregulation of ileal expression of Fgf15 in JQ-1 treated mice suggested  
199 that the bile acid-Fgf15 feedback loop might play a prominent role in systemic metabolic  
200 effects of JQ-1. To test this hypothesis at a cellular level, we utilized the human intestinal  
201 cell line HT-29, which constitutively expresses FGF19 at a high level (Vergnes et al.,  
202 2013). HT-29 cells were treated with 500 nM JQ-1 for 24 hours. While there was no  
203 change in *BRD4* expression (**Figure 3A**), expression of the Brd4 target gene *MYC* was

204 reduced by 83% with JQ-1 ( $p < 0.01$ ), as predicted (**Figure 3B**). In parallel, expression  
205 of *FGF19* was reduced by 96% ( $p < 0.01$ ) with similar dramatic reduction in *SHP* (89%  
206 reduction,  $p < 0.01$ ) (**Figure 3C, D**). There was no change in *FXR* or *SLC51B*  
207 expression (data not shown), consistent with prior evidence indicating BRD4 does not  
208 bind to *FXR* or *SLC51B* (GSE73319 (McClelland et al., 2016) and ENCSR514EOE  
209 (Consortium, 2012). Moreover, secretion of FGF19 into culture medium was completely  
210 abolished by JQ-1, with >98% decrease in the conditioned medium ( $p < 0.01$ , **Figure 3E**).  
211 To determine whether JQ-1 mediated reduction in expression of FGF19 and SHP was  
212 mediated by modulation of BRD4 binding to promoter regions of these genes, we  
213 performed CHIP-PCR analysis using an anti-BRD4 antibody (**Figure 3F**) (Rathert et al.,  
214 2015). As expected, BRD4 bound to its target Myc (control); Brd4 also bound robustly to  
215 promoter sequences of both FGF19 and SHP (**Figure 3G, H**). This was markedly  
216 inhibited by JQ-1, with a >90% reduction in binding (**Figure 3G, H**).

217

### 218 ***Overexpression of FGF19 reverses glucose intolerance induced by JQ-1***

219 To determine the requirement for FGF15/19 signaling in mediating the metabolic  
220 effects of JQ-1, we treated mice with AAV-FGF19 or GFP control vectors, and then  
221 treated mice with JQ-1 (25 mg/kg, ip) for 10 days (**Figure 4A**). Plasma FGF19 was not

222 detectable in AAV-GFP controls, but was readily detected in plasma of AAV-FGF19 mice  
223 (**Figure 4B**). Consistent with prior studies (Lan et al., 2017; Morton et al., 2013),  
224 AAV-FGF19-treated mice had lower body weight and blood glucose levels at baseline  
225 (**Figure 4C**) but weight did not change during JQ-1 treatment in either GFP or FGF19  
226 groups (**Figure 4C**). As with prior cohorts, JQ-1 increased blood glucose in AAV-GFP  
227 control mice as early as 4 days after the onset of treatment, but this effect was not  
228 observed in AAV- FGF19 mice. Glucose tolerance testing at day 10 of treatment again  
229 revealed significant impairment in JQ-1 treated mice (35% increase in glucose AUC,  $p <$   
230 0.01) (**Figure 4D**). By contrast, the ability of JQ-1 to impair glucose tolerance was fully  
231 reversed in mice overexpressing FGF19 (**Figure 4D, E**). Moreover, overexpression of  
232 FGF19 reduced both basal and glucose-stimulated insulin levels (**Figure 4F**), indicating  
233 FGF19-mediated reversal of glucose tolerance in JQ-1 treated mice is  
234 insulin-independent.  
235

236 **Discussion**

237 Our studies identify the intestinal Fgf15/19 hormonal axis as a target of epigenetic  
238 and transcriptional regulation by the bromodomain protein Brd4 and its inhibitor JQ-1.  
239 We demonstrate that pharmacological inhibition of Brd4 induces hyperglycemia and  
240 impaired glucose tolerance in mice, via inhibition of intestinal FGF15 expression and  
241 reduced Fgfr4-mediated signaling in liver. CHIP-PCR analysis revealed that FGF19 and  
242 SHP are novel targets of Brd4 in intestine, and that JQ-1 reduced Brd4 binding to the  
243 promoter of these targets, reduced their expression, and reduced secretion of FGF19.  
244 Experimental overexpression of FGF19 normalized JQ-1-induced hyperglycemia. Thus,  
245 Brd4-dependent transcription is a potent regulator of intestinal endocrine function and  
246 systemic glucose metabolism via FGF15/19-dependent mechanisms.

247 Our data provide new evidence supporting epigenetic regulation of intestinal function  
248 and metabolism and identification of new gene targets of Brd4 regulation. Prior studies  
249 have demonstrated that genetic or pharmacologic inhibition of Brd4-dependent  
250 signaling (Bolden et al., 2014) (Nakagawa et al., 2016) can modulate intestinal cell  
251 populations. While we also find that JQ-1 decreased the number of Reg4+ Paneth cells,  
252 there was no change in the Paneth cell functional marker Crp4 (Ouellette, 2011)  
253 **(Figure S3)** nor in ileal expression of cytokines (data not shown). Moreover, JQ-1 did

254 not alter markers of additional intestinal cell populations. Thus, effects of JQ-1 in our  
255 experimental conditions do not appear to require alterations in Paneth cell-linked host  
256 defense systems or cell type distribution. Rather, our data point to new targets of Brd4  
257 action in the intestine – including regulation of enterocyte Fgf15/19 expression – with  
258 secondary effects on hepatic and systemic glucose and sterol lipid metabolism.

259 Fgf15/19 expression and secretion in the intestine can be regulated by bile acid  
260 binding to the luminal bile acid receptor Tgr5 or the nuclear receptor Fxr. We observed  
261 no change in expression of Tgr5, the apical bile acid transporter Slc10a2, Fxr, or Rxr,  
262 and plasma levels of bile acids did not differ significantly in JQ-1-treated mice. We  
263 cannot exclude the possibility that luminal signaling via bile acids or other metabolites  
264 could contribute to reduced intestinal Fgf15 expression and secretion in response to  
265 JQ-1 in vivo. However, our data in cultured cells suggest that JQ-1 exerts a direct, cell  
266 autonomous effect on transcription and secretion of Fgf15/19 via inhibition of Brd4.

267 Our data suggest that inhibition of Fgf15/19 is also the dominant mediator of in vivo  
268 metabolic effects of JQ-1. Fgf15/19 is increasingly recognized as a potent regulator of  
269 systemic glucose metabolism. Direct administration or transgenic overexpression of  
270 FGF19 in mice fed either chow or high fat diet improves glucose tolerance, despite  
271 lower insulin levels (Fu et al.; Tomlinson et al., 2002), and reverses obesity,

272 hyperglycemia, and insulin resistance in mice with genetic obesity (Fu et al., 2004;  
273 Morton et al., 2013). Such improvements in systemic glucose metabolism may result  
274 in part from FGF-19 effects to increase insulin-independent glucose uptake (Morton et  
275 al.) and reduce adiposity (Tomlinson et al., 2002). Interestingly, increased plasma  
276 levels of Fgf19 have been implicated as a mediator of the potent impact of bariatric and  
277 intestinal surgery to reduce blood glucose levels, with sustained remission of T2D  
278 (Bozadjieva et al., 2018) and development of post-bariatric hypoglycemia in some  
279 patients (Mulla et al., 2019).

280 A key mediator of systemic effects of FGF15/19 in normal physiology is altered liver  
281 metabolism, with reduced gluconeogenesis and lipogenesis and increased glycogen  
282 synthesis (Nies et al., 2015). Consistent with reduction in hepatic signaling by Fgf15/19  
283 in JQ-1-treated mice, we observed (1) downregulation of Fgfr4 and  $\beta$ -Klotho (Klb)  
284 pathways and reduced signaling, as indicated by reduced Frs2 phosphorylation (**Figure**  
285 **2A-F**), (2) increased hepatic glucose production, as indicated by increased glucose  
286 after glycerol injection (**Figure 1K**) and increased gluconeogenic gene expression  
287 (**Supplemental Figure 1**), (3) reduced plasma and hepatic cholesterol, and (4) global  
288 changes in the hepatic transcriptome within both glucose and lipid metabolic pathways.  
289 Given that the effects of JQ-1 in primary hepatocytes were small in magnitude, cell



290 autonomous effects in the liver do not appear to be dominant. Rather, JQ-1 mediated  
291 repression of intestinal FGF15 expression, secretion, and signaling drives in vivo  
292 systemic and hepatic glucose metabolism, as demonstrated by reversal of  
293 hyperglycemia with restoration of systemic Fgf19 levels.

294 We acknowledge that JQ-1 may have additional Fgf15/19-independent effects.  
295 Neither systemic insulin tolerance nor hepatic insulin signaling were affected by  
296 short-term treatment with JQ-1, indicating insulin resistance was not a major contributor  
297 to hyperglycemia despite prior reports of Brd4 effects on adipogenesis and myogenesis  
298 (Lee et al., 2017). While there were no differences in pancreatic islet size or insulin  
299 staining, glucose-stimulated insulin levels were lower in JQ-1-treated mice. While  
300 BRD4 can modulate senescence-associated genes in islets in the setting of  
301 autoimmunity in mice (Thompson et al., 2019), our data indicate that effects of JQ-1 on  
302 insulin secretion are not dominant in our model, as FGF19 overexpression reduced  
303 insulin levels but still reversed JQ-1-mediated hyperglycemia. Additional systemic or  
304 extrahepatic metabolic effects of inhibition of Brd4-mediated transcription (Lee et al.,  
305 2017; Thompson et al., 2019) could also contribute to hyperglycemia induced by JQ-1.

306 In summary, inhibition of the bromodomain protein Brd4 by JQ-1 inhibits FGF15  
307 and SHP expression in ileum, resulting in reduced FGFR signaling in liver, altered sterol

308 metabolism, increased gluconeogenesis, and hyperglycemia. Effects of JQ-1 on  
309 glucose metabolism were FGF15/19 dependent, as overexpression of FGF19 reversed  
310 hyperglycemia induced by JQ-1. Thus, our studies identify FGF15/19 as a hormonal  
311 target of epigenetic regulation potentially contributing to systemic metabolic control.  
312

313 **ACKNOWLEDGMENTS**

314 We gratefully acknowledge grant support from NIH DK106193 (to MEP), R01DK101043  
315 (to LG), R01CA142106 and R01HD093540 (to JQ), and DK036836 (Joslin DRC). CK  
316 was supported by Sunstar Foundation, and SO was supported by the Prince Mahidol  
317 Award Foundation. We also thank NGM for providing adenoviral FGF19 and GFP.  
318

319 **METHODS**

320 ***Animal Care and Studies***

321 Male CD-1 mice obtained from Envigo (South Easton, MA, USA) were housed (3-5  
322 per cage) in at 24 °C under a 12-hour light/dark cycle, with free access to food and  
323 water. All animal experiments were approved by the IACUC at Joslin Diabetes Center  
324 and conducted in accordance with the NIH Guide for the Care and Use of Laboratory  
325 Animals.

326 ***Metabolic parameters***

327 Glucose tolerance was assessed after intraperitoneal injection of glucose (1 or 2 g/kg  
328 body weight after a 16 hour fast. Blood glucose was measured via tail vein sampling at  
329 the indicated time points. Insulin tolerance was assessed after intraperitoneal injection  
330 of human insulin (0.5 units/kg body weight, Lilly) after a 4-hour fast. Plasma insulin and  
331 glucagon were measured using an enzyme-linked immunosorbent assay (ELISA) kit  
332 (Crystal Chem and R&D, respectively). Plasma triglyceride (TG) and total cholesterol  
333 were measured using colorimetric assays (Cayman Chemical and Cell Biolabs).

334 ***In vivo treatment with the bromodomain inhibitor JQ-1***

335 The Brd4 inhibitor JQ1 was synthesized and purified in the laboratory of Dr. Jun Qi  
336 (DFCI). For in vivo experiments, a stock solution (50 mg/mL in DMSO) was diluted to a

337 working concentration of 5 mg/mL in 10% hydroxypropyl  $\beta$ -cyclodextrin (Sigma). Mice  
338 were injected at a dose of 25 or 50 mg/kg given intraperitoneally. Vehicle controls were  
339 given an equal amount of DMSO in 10% hydroxypropyl  $\beta$ -cyclodextrin. For in vitro  
340 experiments, JQ1 was dissolved in DMSO and added to cells at indicated  
341 concentrations, with equal volume of DMSO as control.

#### 342 ***Adenoviral overexpression of FGF19***

343 Mice received a single tail vein injection of  $3 \times 10^{11}$  vector genome adeno-associated  
344 virus (AAV)-FGF19 or a control virus encoding green fluorescent protein (GFP;  
345 AAV-GFP). After 16 days of treatment, tissues were collected.

#### 346 ***Quantitative real-time PCR***

347 Total RNA was extracted using Trizol reagent (Thermo Fisher Scientific, Inc., Waltham,  
348 MA, USA), and cDNA was synthesized using a High-Capacity cDNA Reverse  
349 Transcription Kit (Thermo Fisher Scientific) according to manufacturer's instructions.  
350 Quantitative real-time PCR was performed using SYBR Green (Bio-Rad, Hercules, CA,  
351 USA). Expression was normalized by *Rn18s* (18S rRNA), *Rpl13a* or *36B4*. Primer  
352 sequences are provided in **Table S2**.

#### 353 ***Microarray analysis***

354 Total RNA was isolated from liver tissue from 4 representative mice per group. RNA  
355 quality was assessed using Agilent 2100 bioanalyzer (Agilent Technologies, Palo Alto,  
356 CA), and samples were processed for microarray analysis (Affymetrix Mouse Gene 2.0  
357 ST, Molecular Phenotyping Core, Joslin).

### 358 ***Bioinformatic analysis***

359 For liver transcriptomics and metabolomics datasets, principal component analysis  
360 (PCA) revealed that the first principal component was an extraneous source of variation,  
361 so it was accounted for as a covariate in linear modeling (Leek et al., 2010).  
362 Metabolomics/lipidomics sample weights were unbiasedly estimated (Ritchie et al.,  
363 2006) and used in linear modelling. Linear modeling differential analysis was done with  
364 the R package limma (Ritchie et al., 2015). Nominal p-values were corrected for multiple  
365 testing using the false discovery rate (FDR). Transcriptomic pathway and transcription  
366 factor prediction analysis was done using the Roast method (Wu et al., 2010) with  
367 pathways defined by Reactome (Fabregat et al., 2018).

### 368 ***Immunohistochemistry (IHC)***

369 Pancreata were dissected and fixed in 4% paraformaldehyde, embedded in paraffin,  
370 and sectioned. Sections were stained using H&E or immunostained for lysozyme  
371 (1:1000; ab108508, Abcam) and insulin (1:100; #4590, Cell Signaling technology). Islet

372 area was calculated from analysis of more than 100 islets per mouse (Adobe  
373 Photoshop).

#### 374 ***Cell culture***

375 The human intestinal cell line (HT-29) cells (American Type Cell Collection, Manassas,  
376 VA, USA) were maintained in McCoy's 5A medium (ThermoFisher Scientific)  
377 supplemented with 10% FBS, 1% PenStrep (ThermoFisher Scientific) in a humidified  
378 atmosphere with 5% CO<sub>2</sub> at 37 °C.

#### 379 ***Primary hepatocyte isolation and measurement of glucose production***

380 Primary hepatocytes were isolated from C57BL/6 mice after liver perfusion with  
381 collagenase and seeded 1 x 10<sup>5</sup> cells/ml into collagen coated plates containing DMEM  
382 (ThermoFisher Scientific). The media were changed after 4 hours. Primary hepatocyte  
383 experiments were performed the day after isolation. Glucose production in primary  
384 hepatocytes was measured as preciously described (Matsumoto and Sakai, 2012).  
385 Briefly, after 6 h serum starvation with or without JQ-1 and FGF19, cells were cultured in  
386 glucose and phenol red-free DMEM with or without insulin (10, 100 nM), JQ-1 (250 nM)  
387 and FGF19 (100 ng/ml) for 5 h. The medium was used to determine glucose  
388 concentrations with the Glucose (HK) Assay Kit (Sigma).

#### 389 ***Chromatin immunoprecipitation (ChIP)-PCR***

390   ChIP was performed on HT-29 cells cultured in the presence or absence of  
391   JQ1 (250 nM, 24 hr). Chromatin pooled from approximately  $1 \times 10^6$  HT-29 cells was  
392   used for each immunoprecipitation. HT-29 cells were fixed directly on the dish with 1%  
393   formaldehyde for 10 minutes followed by quenching with 0.125M glycine for 5 minutes.  
394   Chromatin was extracted, followed by shearing on a Tekmar Sonic Disruptor (Cincinnati,  
395   OH, USA) (3 cycles, 80% Amp and 6 sec pulse, 5 min on/off). The sonicated chromatin  
396   was immunoprecipitated with 5  $\mu$ g of antibody (anti-BRD4, Bethyl #A301-985A), bound  
397   to Dynabeads (Invitrogen) as previously described (Anand et al., 2013). Cross-linking  
398   was reversed in immunoprecipitate and input chromatin samples prior to purification of  
399   genomic DNA. Target and non-target regions of genomic DNA were amplified by PCR or  
400   qRT-PCR in both the immunoprecipitates and input samples using SYBR Green  
401   chemistry. Enrichment was calculated as a percentage of input DNA for each sample.  
402   ChIP-PCR primer sequences are shown in **Table S2**. ChIP-PCR primers for MYC were  
403   previously described (Rathert et al., 2015).

#### 404   ***Metabolomics***

405   Tissues harvested after 11 days of treatment were used for analysis of plasma and liver  
406   metabolites, using liquid chromatography-mass spectrometry (LC/MS) to determine  
407   metabolites (Roberts et al., 2012). Missing data were imputed with half of the minimum



408 intensity of the metabolite, and the imputed data were quantile normalized and  
409  $\log_2$ -transformed.

#### 410 ***Statistical analysis***

411 Data are expressed as mean  $\pm$  SEM. One-way ANOVA and repeated-measures  
412 ANOVA followed by multiple comparison tests (Bonferroni/Dunn method) were used  
413 where applicable. Student's *t*-test was used to analyze the differences between two  
414 groups. Differences were considered significant at  $P < 0.05$ .

415

416 **References**

- 417 Anand, P., Brown, J.D., Lin, C.Y., Qi, J., Zhang, R., Artero, P.C., Alaiti, M.A., Bullard, J.,  
418 Alazem, K., Margulies, K.B., et al. (2013). BET bromodomains mediate transcriptional  
419 pause release in heart failure. *Cell* *154*, 569-582.
- 420 Barrow, J.J., Balsa, E., Verdeguer, F., Tavares, C.D., Soustek, M.S., Hollingsworth,  
421 L.R.t., Jedrychowski, M., Vogel, R., Paulo, J.A., Smeitink, J., et al. (2016).  
422 Bromodomain Inhibitors Correct Bioenergetic Deficiency Caused by Mitochondrial  
423 Disease Complex I Mutations. *Mol Cell* *64*, 163-175.
- 424 Bolden, J.E., Tasdemir, N., Dow, L.E., van Es, J.H., Wilkinson, J.E., Zhao, Z., Clevers,  
425 H., and Lowe, S.W. (2014). Inducible in vivo silencing of Brd4 identifies potential  
426 toxicities of sustained BET protein inhibition. *Cell Rep* *8*, 1919-1929.
- 427 Bozadjieva, N., Heppner, K.M., and Seeley, R.J. (2018). Targeting FXR and FGF19 to  
428 Treat Metabolic Diseases-Lessons Learned From Bariatric Surgery. *Diabetes* *67*,  
429 1720-1728.
- 430 Consortium, E.P. (2012). An integrated encyclopedia of DNA elements in the human  
431 genome. *Nature* *489*, 57-74.
- 432 Fabregat, A., Jupe, S., Matthews, L., Sidiropoulos, K., Gillespie, M., Garapati, P., Haw,  
433 R., Jassal, B., Korninger, F., May, B., et al. (2018). The Reactome Pathway  
434 Knowledgebase. *Nucleic acids research* *46*.
- 435 Filippakopoulos, P., Qi, J., Picaud, S., Shen, Y., Smith, W.B., Fedorov, O., Morse, E.M.,  
436 Keates, T., Hickman, T.T., Felletar, I., et al. (2010). Selective inhibition of BET  
437 bromodomains. *Nature* *468*, 1067-1073.
- 438 Fu, L., John, L.M., Adams, S.H., Yu, X.X., Tomlinson, E., Renz, M., Williams, P.M.,  
439 Soriano, R., Corpuz, R., Moffat, B., et al. (2004). Fibroblast growth factor 19 increases  
440 metabolic rate and reverses dietary and leptin-deficient diabetes. *Endocrinology* *145*,  
441 2594-2603.
- 442 Gaur, V., Connor, T., Sanigorski, A., Martin, S.D., Bruce, C.R., Henstridge, D.C., Bond,  
443 S.T., McEwen, K.A., Kerr-Bayles, L., Ashton, T.D., et al. (2016). Disruption of the Class  
444 IIa HDAC Corepressor Complex Increases Energy Expenditure and Lipid Oxidation.  
445 *Cell Rep* *16*, 2802-2810.
- 446 Hong, S., Zhou, W., Fang, B., Lu, W., Loro, E., Damle, M., Ding, G., Jager, J., Zhang, S.,  
447 Zhang, Y., et al. (2017). Dissociation of muscle insulin sensitivity from exercise  
448 endurance in mice by HDAC3 depletion. *Nat Med* *23*, 223-234.

- 449 Huang, B., Yang, X.D., Zhou, M.M., Ozato, K., and Chen, L.F. (2009). Brd4 coactivates  
450 transcriptional activation of NF-kappaB via specific binding to acetylated RelA. *Mol Cell*  
451 *Biol* 29, 1375-1387.
- 452 Kim, Y.C., Byun, S., Zhang, Y., Seok, S., Kemper, B., Ma, J., and Kemper, J.K. (2015).  
453 Liver CHIP-seq analysis in FGF19-treated mice reveals SHP as a global transcriptional  
454 partner of SREBP-2. *Genome Biol* 16.
- 455 Kliewer, S.A., and Mangelsdorf, D.J. (2015). Bile Acids as Hormones: The  
456 FXR-FGF15/19 Pathway. *Digest Dis* 33, 327-331.
- 457 Lan, T., Morgan, D.A., Rahmouni, K., Sonoda, J., Fu, X., Burgess, S.C., Holland, W.L.,  
458 Kliewer, S.A., and Mangelsdorf, D.J. (2017). FGF19, FGF21, and an  
459 FGFR1/beta-Klotho-Activating Antibody Act on the Nervous System to Regulate Body  
460 Weight and Glycemia. *Cell Metab* 26, 709-718 e703.
- 461 Lee, J.E., Park, Y.K., Park, S., Jang, Y., Waring, N., Dey, A., Ozato, K., Lai, B., Peng, W.,  
462 and Ge, K. (2017). Brd4 binds to active enhancers to control cell identity gene induction  
463 in adipogenesis and myogenesis. *Nat Commun* 8, 2217.
- 464 Leek, J.T., Scharpf, R.B., Bravo, H.C., Simcha, D., Langmead, B., Johnson, W.E.,  
465 Geman, D., Baggerly, K., and Irizarry, R.A. (2010). Tackling the widespread and critical  
466 impact of batch effects in high-throughput data. *Nat Rev Genet* 11, 733-739.
- 467 Liu, S., Marcelin, G., Blouet, C., Jeong, J.H., Jo, Y.H., Schwartz, G.J., and Chua, S., Jr.  
468 (2018). A gut-brain axis regulating glucose metabolism mediated by bile acids and  
469 competitive fibroblast growth factor actions at the hypothalamus. *Molecular metabolism*  
470 8, 37-50.
- 471 Markan, K.R., and Potthoff, M.J. (2016). Metabolic fibroblast growth factors (FGFs):  
472 Mediators of energy homeostasis. *Semin Cell Dev Biol* 53, 85-93.
- 473 Marmorstein, R., and Zhou, M.M. (2014). Writers and readers of histone acetylation:  
474 structure, mechanism, and inhibition. *Cold Spring Harb Perspect Biol* 6, a018762.
- 475 Matsumoto, M., and Sakai, M. (2012). Glucose Production Assay in Primary Mouse  
476 Hepatocytes. *Bio-protocol* 2, e284.
- 477 Mauro, C., Leow, S.C., Anso, E., Rocha, S., Thotakura, A.K., Tornatore, L., Moretti, M.,  
478 De Smaele, E., Beg, A.A., Tergaonkar, V., et al. (2011). NF-kappaB controls energy  
479 homeostasis and metabolic adaptation by upregulating mitochondrial respiration. *Nat*  
480 *Cell Biol* 13, 1272-1279.
- 481 McClelland, M.L., Mesh, K., Lorenzana, E., Chopra, V.S., Segal, E., Watanabe, C., Haley,

- 482 B., Mayba, O., Yaylaoglu, M., Gnad, F., et al. (2016). CCAT1 is an enhancer-templated  
483 RNA that predicts BET sensitivity in colorectal cancer. *J Clin Invest* 126, 639-652.
- 484 Morton, G.J., Matsen, M.E., Bracy, D.P., Meek, T.H., Nguyen, H.T., Stefanovski, D.,  
485 Bergman, R.N., Wasserman, D.H., and Schwartz, M.W. (2013). FGF19 action in the  
486 brain induces insulin-independent glucose lowering. *J Clin Invest* 123, 4799-4808.
- 487 Mulla, C.M., Goldfine, A.B., Dreyfuss, J.M., Houten, S., Pan, H., Pober, D.M., Wewer  
488 Albrechtsen, N.J., Svane, M.S., Schmidt, J.B., Holst, J.J., et al. (2019). Plasma FGF-19  
489 Levels are Increased in Patients with Post-Bariatric Hypoglycemia. *Obes Surg* 29,  
490 2092-2099.
- 491 Nakagawa, A., Adams, C.E., Huang, Y., Hamarneh, S.R., Liu, W., Von Alt, K.N.,  
492 Mino-Kenudson, M., Hodin, R.A., Lillemoe, K.D., Fernandez-Del Castillo, C., et al.  
493 (2016). Selective and reversible suppression of intestinal stem cell differentiation by  
494 pharmacological inhibition of BET bromodomains. *Sci Rep* 6, 20390.
- 495 Nies, V.J., Sancar, G., Liu, W., van Zutphen, T., Struik, D., Yu, R.T., Atkins, A.R., Evans,  
496 R.M., Jonker, J.W., and Downes, M.R. (2015). Fibroblast Growth Factor Signaling in  
497 Metabolic Regulation. *Front Endocrinol (Lausanne)* 6, 193.
- 498 Ouellette, A.J. (2011). Paneth cell alpha-defensins in enteric innate immunity. *Cell Mol*  
499 *Life Sci* 68, 2215-2229.
- 500 Owen, B.M., Mangelsdorf, D.J., and Kliewer, S.A. (2015). Tissue-specific actions of the  
501 metabolic hormones FGF15/19 and FGF21. *Trends Endocrinol Metab* 26, 22-29.
- 502 Pinney, S.E., and Simmons, R.A. (2010). Epigenetic mechanisms in the development of  
503 type 2 diabetes. *Trends Endocrinol Metab* 21, 223-229.
- 504 Rathert, P., Roth, M., Neumann, T., Muerdter, F., Roe, J.S., Muhar, M., Deswal, S.,  
505 Cerny-Reiterer, S., Peter, B., Jude, J., et al. (2015). Transcriptional plasticity promotes  
506 primary and acquired resistance to BET inhibition. *Nature* 525, 543-547.
- 507 Ritchie, M.E., Diyagama, D., Neilson, J., van Laar, R., Dobrovic, A., Holloway, A., and  
508 Smyth, G.K. (2006). Empirical array quality weights in the analysis of microarray data.  
509 *BMC Bioinformatics* 7, 261.
- 510 Ritchie, M.E., Phipson, B., Wu, D., Hu, Y., Law, C.W., Shi, W., and Smyth, G.K. (2015).  
511 limma powers differential expression analyses for RNA-sequencing and microarray  
512 studies. *Nucleic Acids Res* 43, e47.
- 513 Roberts, L.D., Souza, A.L., Gerszten, R.E., and Clish, C.B. (2012). Targeted  
514 metabolomics. *Current protocols in molecular biology Chapter 30*, Unit 30 32 31-24.

- 515 Thompson, P.J., Shah, A., Apostolopolou, H., and Bhushan, A. (2019). BET Proteins Are  
516 Required for Transcriptional Activation of the Senescent Islet Cell Secretome in Type 1  
517 Diabetes. *Int J Mol Sci* 20.
- 518 Tomlinson, E., Fu, L., John, L., Hultgren, B., Huang, X., Renz, M., Stephan, J.P., Tsai,  
519 S.P., Powell-Braxton, L., French, D., et al. (2002). Transgenic mice expressing human  
520 fibroblast growth factor-19 display increased metabolic rate and decreased adiposity.  
521 *Endocrinology* 143, 1741-1747.
- 522 Verdin, E., and Ott, M. (2015). 50 years of protein acetylation: from gene regulation to  
523 epigenetics, metabolism and beyond. *Nat Rev Mol Cell Biol* 16, 258-264.
- 524 Vergnes, L., Lee, J.M., Chin, R.G., Auwerx, J., and Reue, K. (2013). Diet1 functions in  
525 the FGF15/19 enterohepatic signaling axis to modulate bile acid and lipid levels. *Cell*  
526 *Metab* 17, 916-928.
- 527 Wang, F., Liu, H., Blanton, W.P., Belkina, A., Lebrasseur, N.K., and Denis, G.V. (2009).  
528 Brd2 disruption in mice causes severe obesity without Type 2 diabetes. *The*  
529 *Biochemical journal* 425, 71-83.
- 530 Wong, B.S., Camilleri, M., Carlson, P.J., Guicciardi, M.E., Burton, D., McKinzie, S., Rao,  
531 A.S., Zinsmeister, A.R., and Gores, G.J. (2011). A Klothobeta variant mediates protein  
532 stability and associates with colon transit in irritable bowel syndrome with diarrhea.  
533 *Gastroenterology* 140, 1934-1942.
- 534 Wu, D., Lim, E., Vaillant, F., Asselin-Labat, M.-L., Visvader, J., and Smyth, G. (2010).  
535 ROAST: rotation gene set tests for complex microarray experiments. *Bioinformatics*  
536 (Oxford, England) 26, 2176-2182.
- 537 Yamauchi, T., Oike, Y., Kamon, J., Waki, H., Komeda, K., Tsuchida, A., Date, Y., Li, M.X.,  
538 Miki, H., Akanuma, Y., et al. (2002). Increased insulin sensitivity despite lipodystrophy in  
539 *Crebbp* heterozygous mice. *Nat Genet* 30, 221-226.
- 540

541 **Figure Legends**

542 **Figure 1. JQ-1 induces hyperglycemia *in vivo*.**

543 (A) Experimental protocol. (B) Body weight changes during JQ-1 treatment ( $n = 5-6$ ).  
544 (C) Fasting blood glucose levels (4-h fasting, day 10,  $n = 5-6$ ). (D, E) Blood glucose  
545 levels and area under the curve (AUC) during ipGTT (day 6). (F, G) Plasma insulin and  
546 glucagon levels during ipGTT. (H) H&E and insulin staining of pancreatic sections. Scale  
547 bar, 200 and 100  $\mu\text{m}$ . (I) Islet size ( $n = 5-6$ ;  $>100$  islets/mouse). (J, K) Intraperitoneal  
548 insulin tolerance test (day10) and glycerol tolerance test (day 4). \* $P < 0.05$ , \*\* $P < 0.01$ ,  
549 vs. vehicle-treated mice (Veh). Data are expressed as means  $\pm$  SEM.

550 **Figure 2. JQ-1 modulates hepatic transcription related to Fgfr signaling, reduces**  
551 **Fgfr signaling, and reduces ileal Fgf15 and Shp expression *in vivo*.**

552 (A-C) Microarray analysis in the liver was performed in JQ-1 vs. vehicle-treated mice ( $n$   
553 = 3 per group). Minus  $\log_{10}$  (p-value) (A) and upregulated or downregulated gene  
554 numbers (B) in pathways related to FGFR signaling. (C) Heatmap demonstrate  $\log_2$  fold  
555 change (JQ-1 vs. vehicle) in gene expression in pathways related to FGFR ligand  
556 binding and activation. (D) Schematic of bile acid signaling in ileal enterocytes. (E-H)  
557 Expression levels of genes related to bile acid signaling in ileum (*Fgf15* (E), *Nr0b2*  
558 (SHP) (F), *Slc51a* (OST $\alpha$ ) (G) and *Slc51b* (OST $\beta$ ) (H)) ( $n = 5-6$ ). Expression levels were

559 normalized by those of *Rpl13*. (I) Plasma FGF15 level in JQ-1 vs. vehicle-treated mice  
560 ( $n = 5-6$ ).  $*P < 0.05$ ,  $**P < 0.01$ , vs. vehicle-treated mice (Veh). Data are expressed as  
561 means  $\pm$  SEM. (J) H&E staining of intestinal sections. Scale bar, 100  $\mu$ m.

562 **Figure 3. BRD4 binds promoter regions of FGF19 and SHP to modulate**  
563 **expression in HT-29 cells.**

564 HT-29 cells were treated with 250 or 500 nM JQ-1 or DMSO (Veh) for 12-24 h. (A-D)  
565 Gene expression levels of *BRD4* (A), *MYC* (B), *FGF19* (C), and *NR0B2* (SHP) (D) ( $n =$   
566 4). The levels were normalized by those of *RN18S*. (E) FGF19 level in conditioned  
567 media ( $n = 4$ ). (F) Primer design for ChIP assays for *FGF19* and *NR0B2* (SHP)  
568 promoter regions. (G-H) Cells were incubated with JQ-1 or DMSO (Veh) for 24 h and  
569 then harvested for the ChIP assay. The precipitated DNA was analyzed by PCR (G) and  
570 real-time PCR (H) ( $n = 4$ ).  $*P < 0.05$ ,  $**P < 0.01$ , vs. vehicle-treated mice (Veh). Data are  
571 expressed as means  $\pm$  SEM.

572 **Figure 4. Overexpression of FGF19 reverses hyperglycemia induced by JQ-1.**

573 (A) Experimental protocol. (B) Plasma FGF19 levels in AAV-GFP- and  
574 AAV-FGF19-treated mice. (C) Body weight in AAV-GFP- and AAV-FGF19-treated mice  
575 during JQ-1 treatment. (D-E) Blood glucose levels (D) and area under the curve (AUC)  
576 (E) during ipGTT (day10). (F) Plasma insulin levels during ipGTT.  $*P < 0.05$ ,  $**P < 0.01$ ,

577 vs. AAV-GFP-treated mice (GFP). Data are expressed as means  $\pm$  SEM.



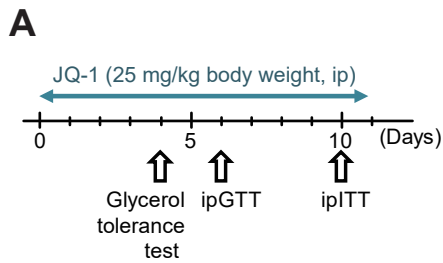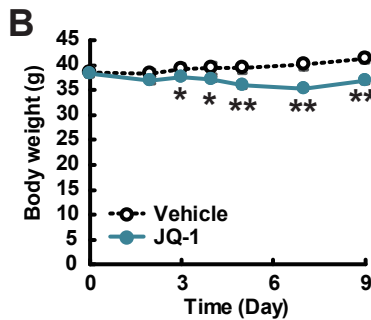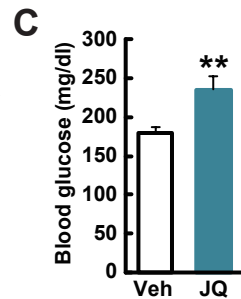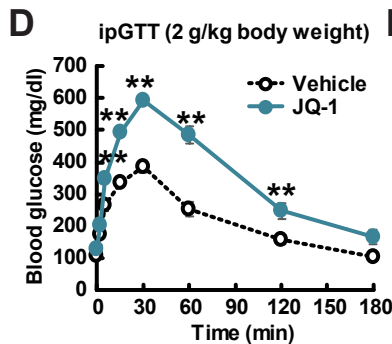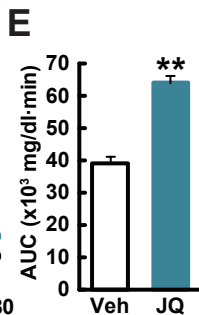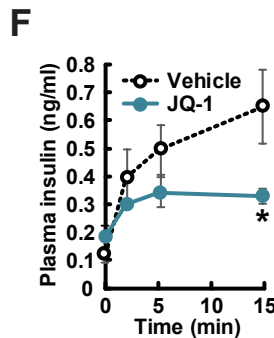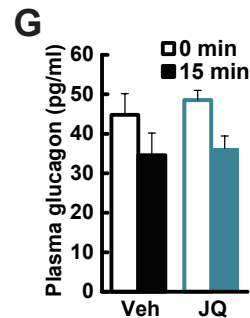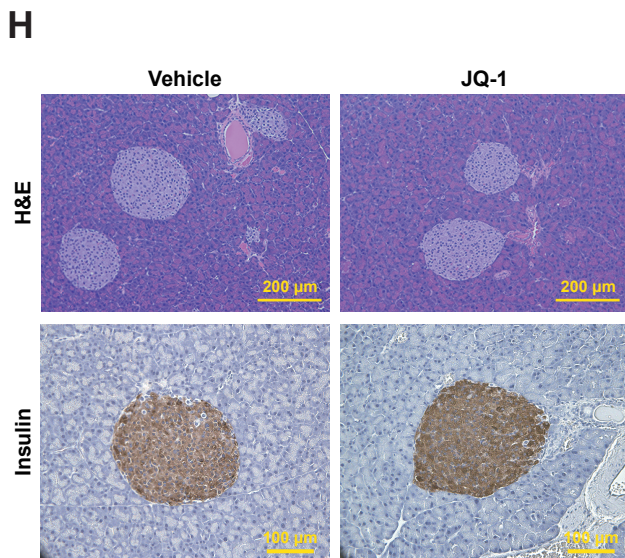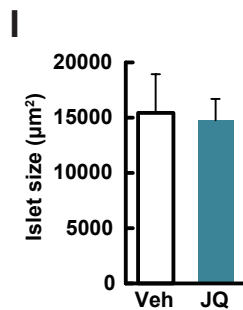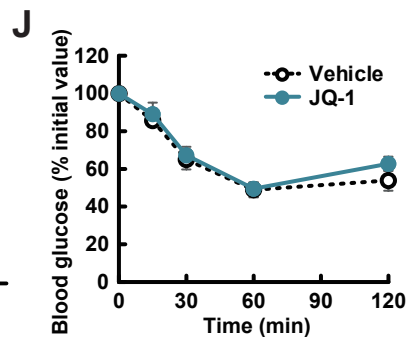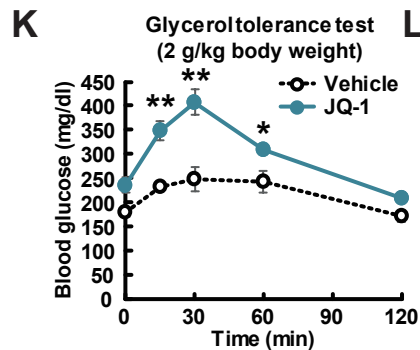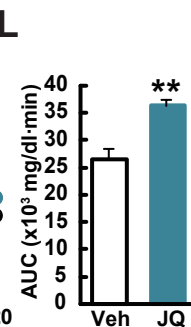

**A****Pathways related to FGFR signaling**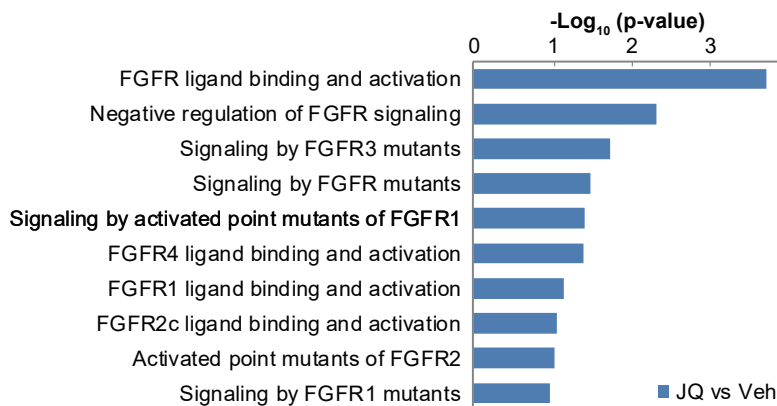**B**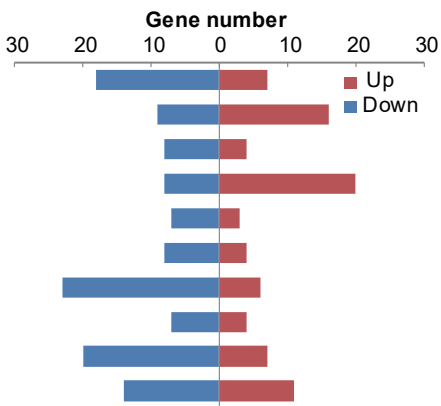**C** FGFR ligand binding and activation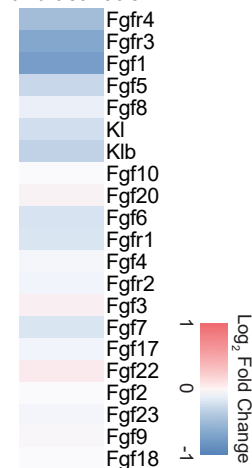**D**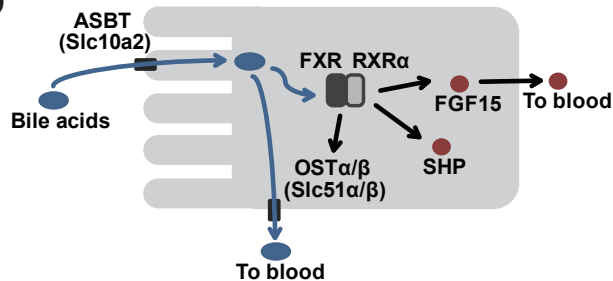**I**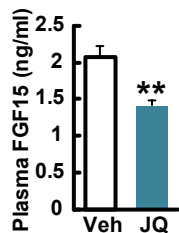**J**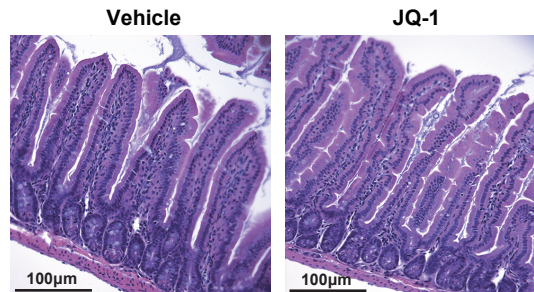**Ileum****E**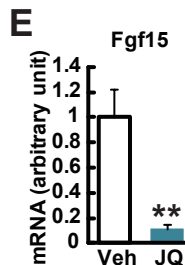**F**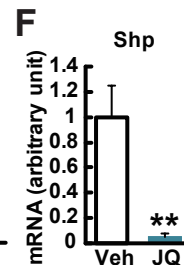**G**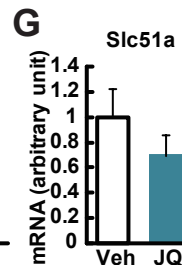**H**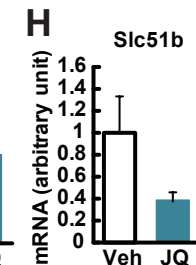

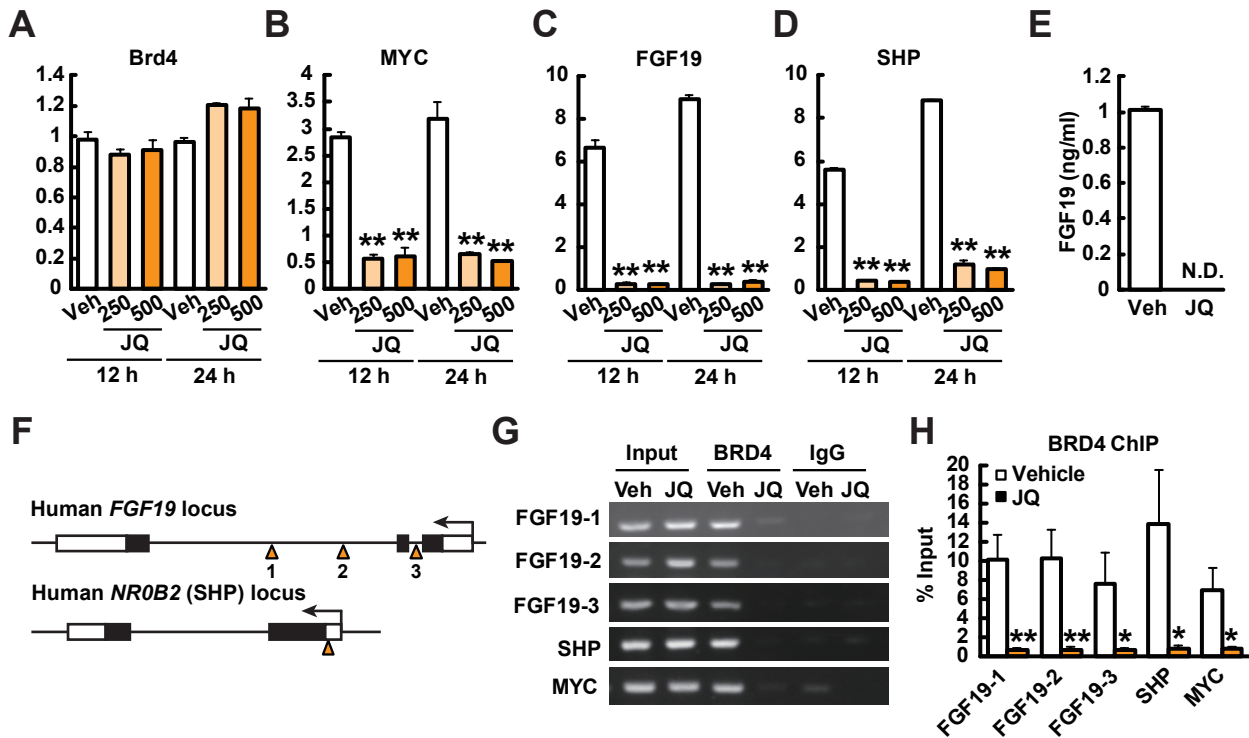

**A**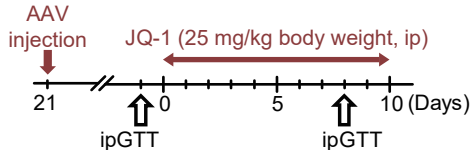**B**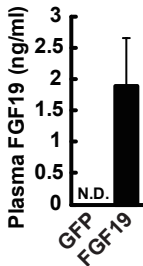**C**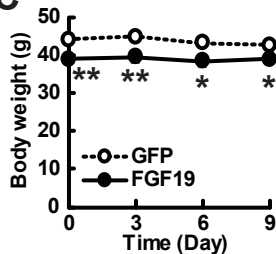**D**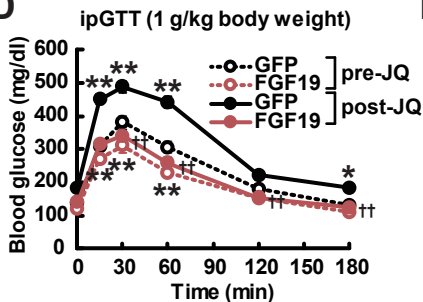**E**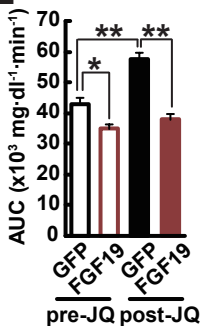**F**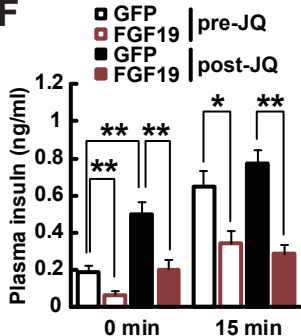

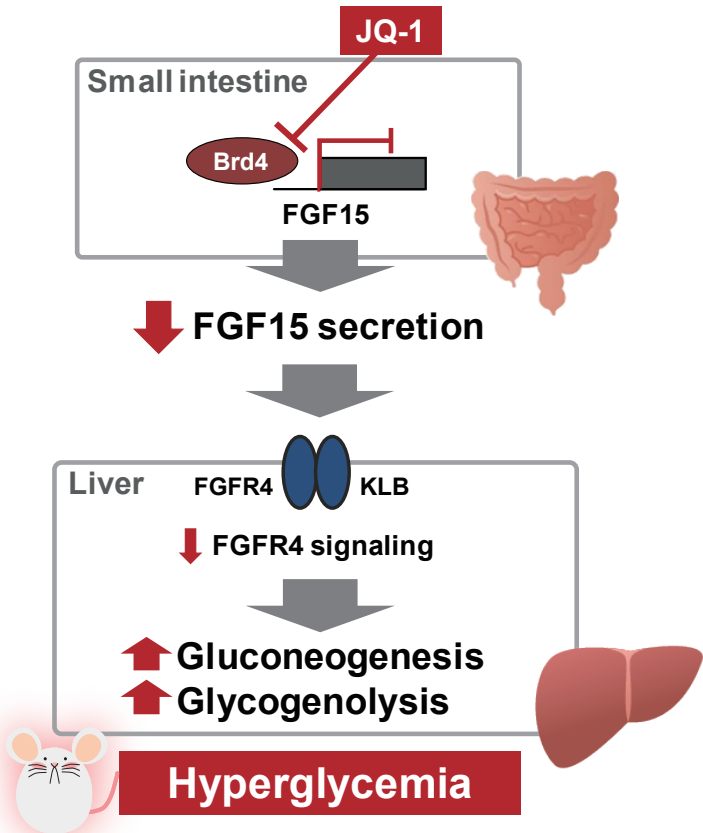

Source: https://www.biorxiv.org/content/biorxiv/early/2019/12/12/2019.12.11.872887.full.pdf
